# Supplementary material for: Synthesis and structural characterisation of Pd(ii) and Pt(ii) complexes with a flexible, ferrocene-based P,S-donor amidophosphine ligand
Source: Royal Society of Chemistry journal article supplement (doi:10.1039/c3dt52760c), 2013-10-30

## Synthesis and structural characterisation of Pd(II) and Pt(II) complexes with a flexible, ferrocene-based P,S-donor amidophosphine ligand

J. Tauchman, I. Císařová and P. Štěpnička\*

### Supporting Information

#### Contents

|                                                                                                                                                      |     |
|------------------------------------------------------------------------------------------------------------------------------------------------------|-----|
| Description of the crystal packing for <b>1</b> and <b>10</b> .....                                                                                  | S-2 |
| View of the complex molecule in the structure of <i>trans-2</i> ·½H <sub>2</sub> O .....                                                             | S-3 |
| Description of the crystal packing of <i>cis-3</i> , <i>trans-2</i> ·½H <sub>2</sub> O and <i>trans-3</i> ·½CH <sub>3</sub> CO <sub>2</sub> Et ..... | S-4 |
| Summary of crystallographic data (Table S1) .....                                                                                                    | S-6 |
| NMR spectra .....                                                                                                                                    | S-7 |

## Description of the crystal packing for **1** and **10**

In the crystal, the molecules of **1** assemble into infinite chains by means of cooperative N–H...O=C and C–H...O=C hydrogen bonds formed between the molecules associated around the crystallographic glide planes (space group  $P2_1/c$ ; Figure S1). Phosphine oxide **10** forms an intramolecular N–H...O=C hydrogen bond (see main text) and its solid-state assembly is based on the soft C–H...X (X = O, S, N) interactions.

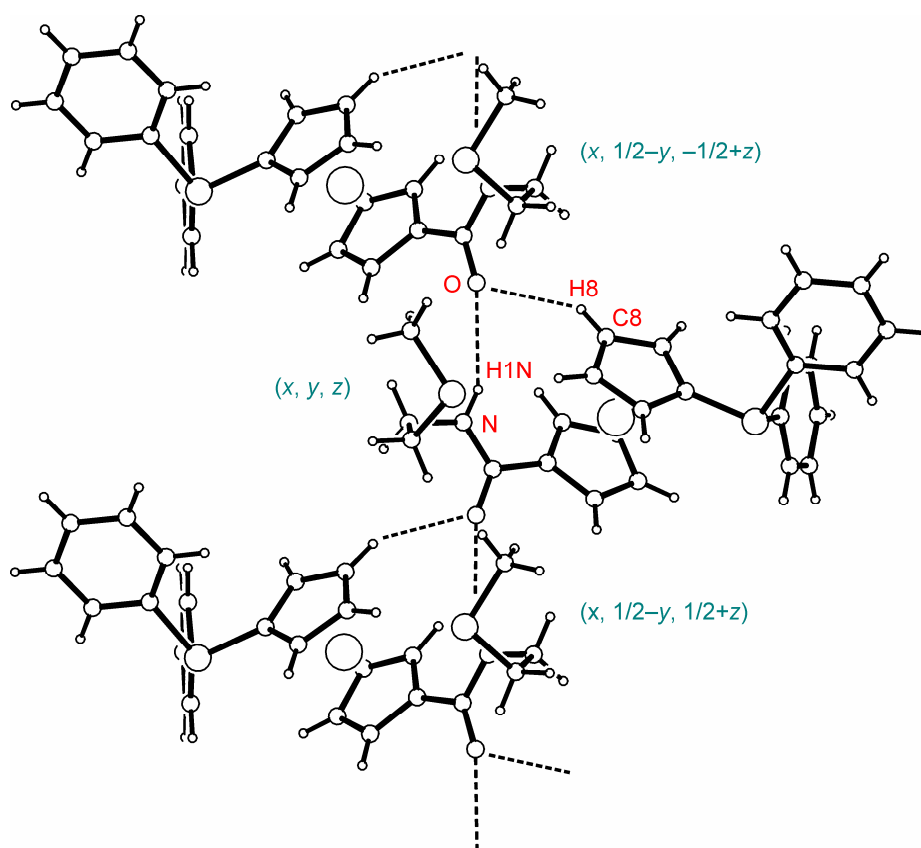

**Figure S1** Section of the infinite hydrogen bonded chain in the structure of phosphine **1** showing the cooperating hydrogen bonds as dashed lined. The H-bond parameters are as follows: N–H1N...O, N...O = 3.339(2) Å, angle at H1N = 153°; C8–H8...O, C8...O = 3.392(2) Å, angle at H8 = 144°.

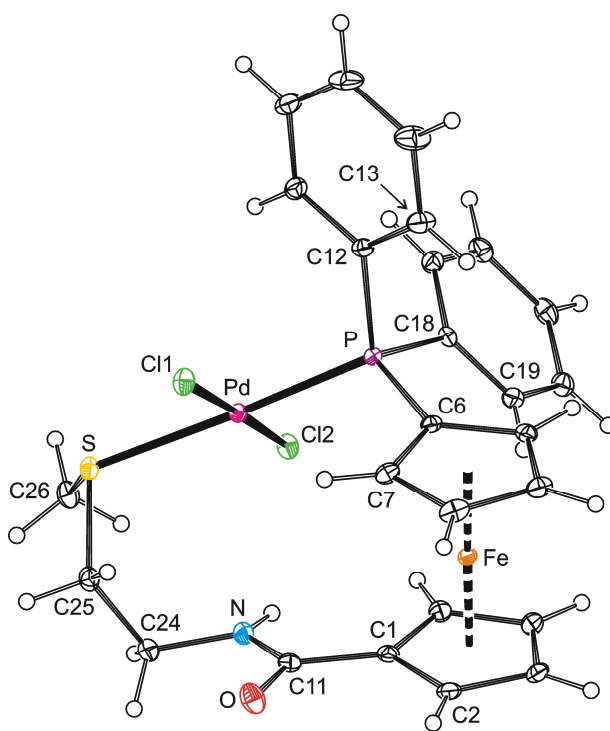

**Figure S2** View of complex molecule in the crystal structure of *trans-2*·½H<sub>2</sub>O with atomic labels and displacement ellipsoids at the 30% probability level.

### Description of the crystal packing of *cis*-**3**, *trans*-**2**·½H<sub>2</sub>O and *trans*-**3**·½CH<sub>3</sub>CO<sub>2</sub>Et

In the crystal state, the molecules of *cis*-**3** associate into centrosymmetric dimers via N–H1N...Cl1 hydrogen bonds (N...Cl = 3.258(2) Å). These dimers further assemble into infinite via offset  $\pi\cdots\pi$  stacking interactions of the inversion-related phenyl rings C(18-23) at the centroid-centroid distance of 3.860(1) Å. Chlorine atom Cl2 forms some additional intermolecular C–H...Cl contacts.

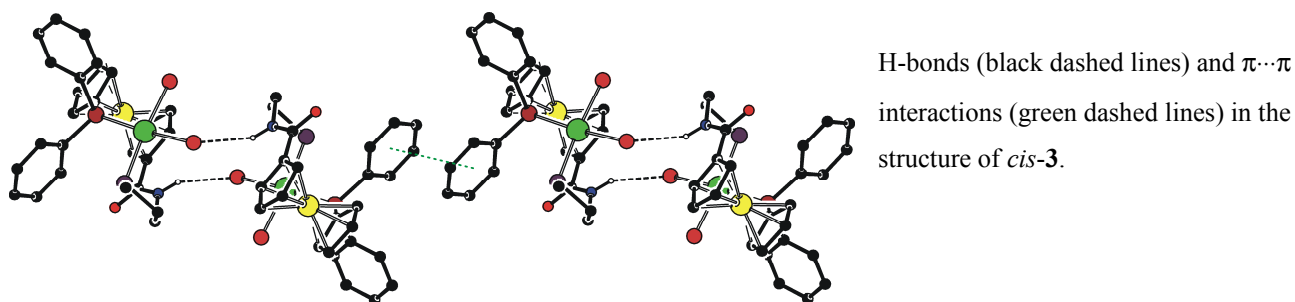

The structure of *trans*-**2**·½H<sub>2</sub>O contains water molecules that are disordered over two equally populated positions in structural voids. These molecules play an important role in the crystal array, linking two adjacent complex molecules via the O1W–H1W...O and O1W–H2W...O hydrogen bonds (O...O1W: 2.917(4) and 2.816(4) Å). In addition, the water oxygen act as a H-bond acceptor for an aromatic CH group (C14–H14...O1W, C14...O1W = 3.441(4) Å). A  $\pi\cdots\pi$  interaction is detected between the proximal cyclopentadienyl rings C(1-5) (centroid distance: 3.940(1) Å). The NH proton does not enter into any intermolecular interactions.

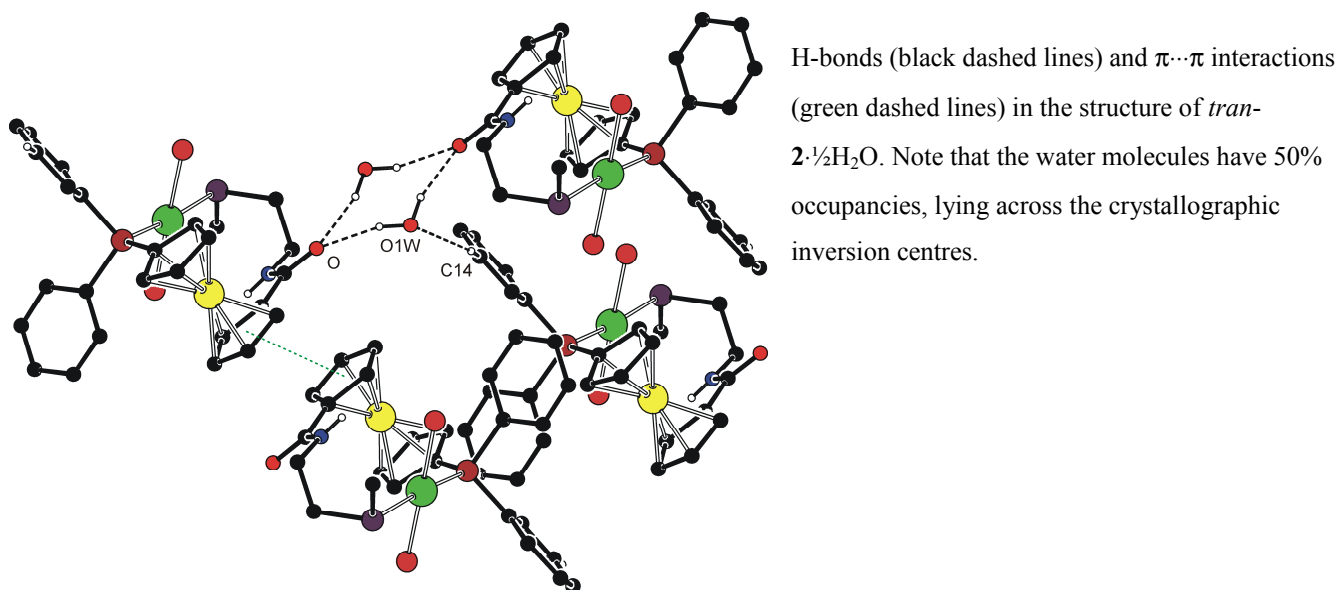

The molecules of complex  $trans\text{-}3 \cdot \frac{1}{2}\text{CH}_3\text{CO}_2\text{Et}$  form hydrogen bonds in which the Cl2 atom behaves as a bifurcate H-bond acceptor, namely in the *intramolecular* N–H1N...Cl2 and *intermolecular* C20–H20...Cl2 interactions. Atom Cl1 is involved in hydrogen bonding towards C16–H16. H-bond lengths are as follows: N...Cl2 = 3.535(2) Å, C20...Cl2 = 3.707(3) Å, C16...Cl1 = 3.751(3) Å. The solvating ethyl acetate is disordered in structural voids left between the bulky complex molecules.

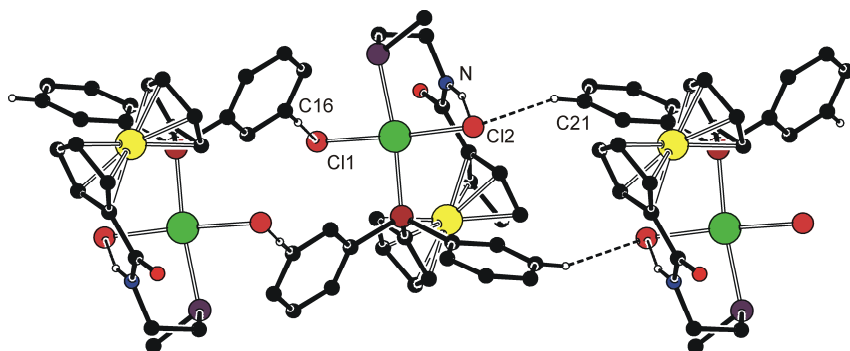

The principal hydrogen bonding interactions in the structure of  $trans\text{-}3 \cdot \frac{1}{2}\text{CH}_3\text{CO}_2\text{Et}$ .

**Table S1** Summary of crystallographic data and structure refinement parameters.<sup>a</sup>

| Compound                                     | <b>1</b>                                    | <b>10</b>                                            | <i>trans-2</i> ·½H <sub>2</sub> O                                        | <i>trans-3</i> ·½CH <sub>3</sub> CO <sub>2</sub> Et                    | <i>cis-3</i>                                             |
|----------------------------------------------|---------------------------------------------|------------------------------------------------------|--------------------------------------------------------------------------|------------------------------------------------------------------------|----------------------------------------------------------|
| Formula                                      | C <sub>26</sub> H <sub>26</sub> FeNOPS      | C <sub>26</sub> H <sub>26</sub> FeNO <sub>2</sub> PS | C <sub>26</sub> H <sub>27</sub> Cl <sub>2</sub> FeNO <sub>1.5</sub> PPdS | C <sub>28</sub> H <sub>30</sub> Cl <sub>2</sub> FeNO <sub>2</sub> PPtS | C <sub>26</sub> H <sub>26</sub> Cl <sub>2</sub> FeNOPPtS |
| <i>M</i>                                     | 487.36                                      | 503.36                                               | 673.67                                                                   | 797.40                                                                 | 753.35                                                   |
| Crystal system                               | monoclinic                                  | triclinic                                            | triclinic                                                                | triclinic                                                              | triclinic                                                |
| Space group                                  | <i>P</i> 2 <sub>1</sub> / <i>c</i> (no. 14) | <i>P</i> -1 (no. 2)                                  | <i>P</i> -1 (no. 2)                                                      | <i>P</i> -1 (no. 2)                                                    | <i>P</i> -1 (no. 2)                                      |
| <i>a</i> /Å                                  | 8.3665(2)                                   | 10.5814(4)                                           | 9.4362(3)                                                                | 9.397(1)                                                               | 8.7438(2)                                                |
| <i>b</i> /Å                                  | 24.8131(6)                                  | 11.0866(4)                                           | 10.7177(3)                                                               | 10.905(1)                                                              | 10.5637(2)                                               |
| <i>c</i> /Å                                  | 11.1353(3)                                  | 11.8118(4)                                           | 14.0579(4)                                                               | 15.384(2)                                                              | 14.1431(3)                                               |
| α/°                                          | 90                                          | 69.962(1)                                            | 109.416(1)                                                               | 95.995(4)                                                              | 91.953(1)                                                |
| β/°                                          | 99.135(1)                                   | 64.830(1)                                            | 107.291(1)                                                               | 102.319(4)                                                             | 90.081(1)                                                |
| γ/°                                          | 90                                          | 81.931(1)                                            | 90.302(1)                                                                | 113.710(4)                                                             | 99.957(1)                                                |
| <i>V</i> /Å <sup>3</sup>                     | 2282.4(1)                                   | 1178.16(7)                                           | 1271.70(6)                                                               | 1377.9(3)                                                              | 1285.89(5)                                               |
| <i>Z</i>                                     | 4                                           | 2                                                    | 2                                                                        | 2                                                                      | 2                                                        |
| <i>D</i> <sub>c</sub> /g mL <sup>-1</sup>    | 1.418                                       | 1.419                                                | 1.759                                                                    | 1.922                                                                  | 1.946                                                    |
| μ(Mo Kα)/mm <sup>-1</sup>                    | 0.841                                       | 0.820                                                | 1.656                                                                    | 5.953                                                                  | 6.370                                                    |
| Diffractions collected                       | 39428                                       | 16356                                                | 19504                                                                    | 20413                                                                  | 21895                                                    |
| Independent/obsd <sup>b</sup> diffns         | 5253/4635                                   | 5129/4407                                            | 5815/5447                                                                | 6309/5977                                                              | 5907/5621                                                |
| <i>R</i> <sub>int</sub> <sup>c</sup> /%      | 2.88                                        | 3.21                                                 | 1.81                                                                     | 1.97                                                                   | 1.98                                                     |
| <i>R</i> <sup>c</sup> observed diffns/%      | 3.39                                        | 3.87                                                 | 1.89                                                                     | 1.64                                                                   | 1.51                                                     |
| <i>R</i> , <i>wR</i> <sup>c</sup> all data/% | 4.03, 8.81                                  | 4.77, 11.5                                           | 2.11, 4.59                                                               | 1.85, 3.47                                                             | 1.67, 3.22                                               |
| Δρ/e Å <sup>-3</sup>                         | 1.19, <sup>e</sup> -0.66                    | 1.11, <sup>f</sup> -0.55                             | 0.35, -0.57                                                              | 0.76, -0.54                                                            | 0.57, -0.38                                              |
| CCDC reference no.                           | 962382                                      | 962383                                               | 962384                                                                   | 962386                                                                 | 962385                                                   |

<sup>a</sup> Common details: *T* = 150(2) K. <sup>b</sup> Diffractions with *I* > 2σ(*I*). <sup>c</sup> Definitions:  $R_{\text{int}} = \sum |F_o^2 - F_o^2(\text{mean})| / \sum F_o^2$ , where  $F_o^2(\text{mean})$  is the average intensity of symmetry-equivalent diffractions.  $R = \sum ||F_o| - |F_c|| / \sum |F_o|$ ,  $wR = [\sum \{w(F_o^2 - F_c^2)^2\} / \sum w(F_o^2)^2]^{1/2}$ . <sup>e</sup> Residual electron density attributable to the lone electron pair at phosphorus atom. <sup>f</sup> Residual electron density near the iron atom.

## NMR spectra

### $^1\text{H}$ NMR spectrum of **1**

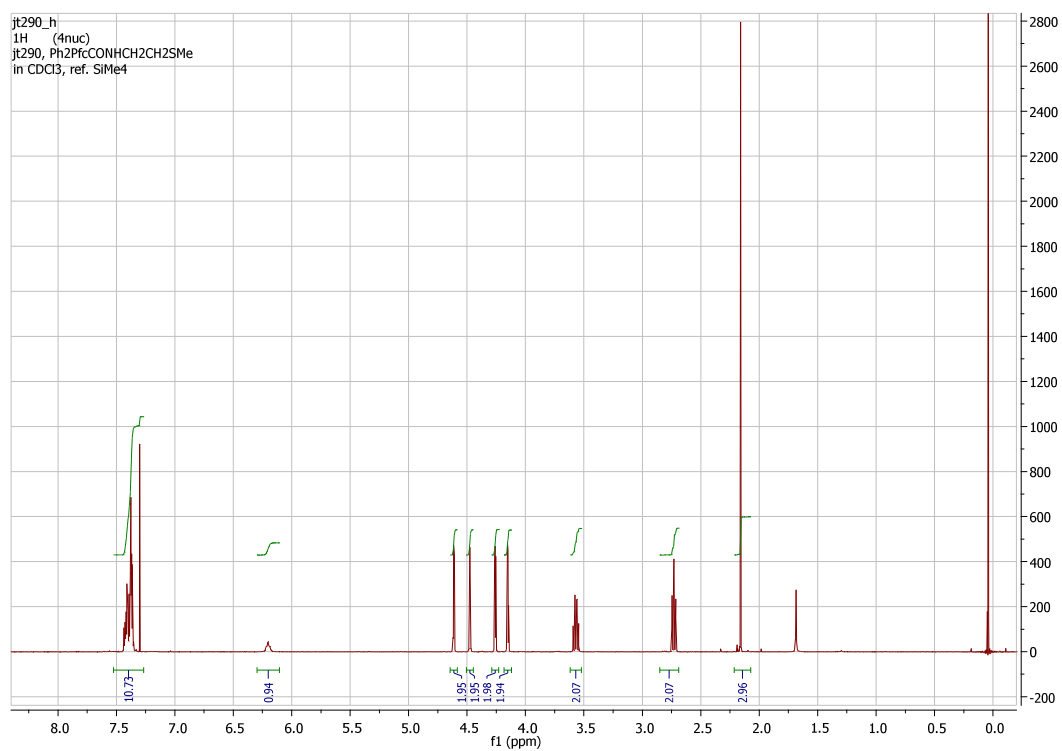

### $^{13}\text{C}\{^1\text{H}\}$ NMR spectrum of **1**

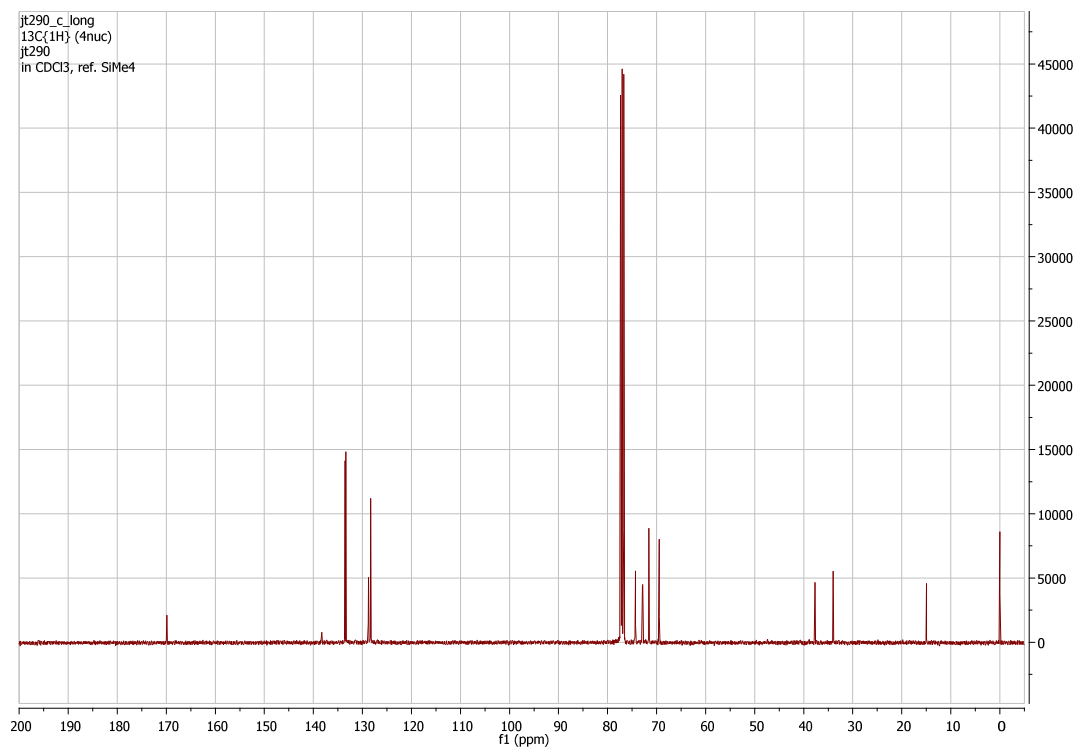

$^{31}\text{P}\{^1\text{H}\}$  NMR spectrum of **1**

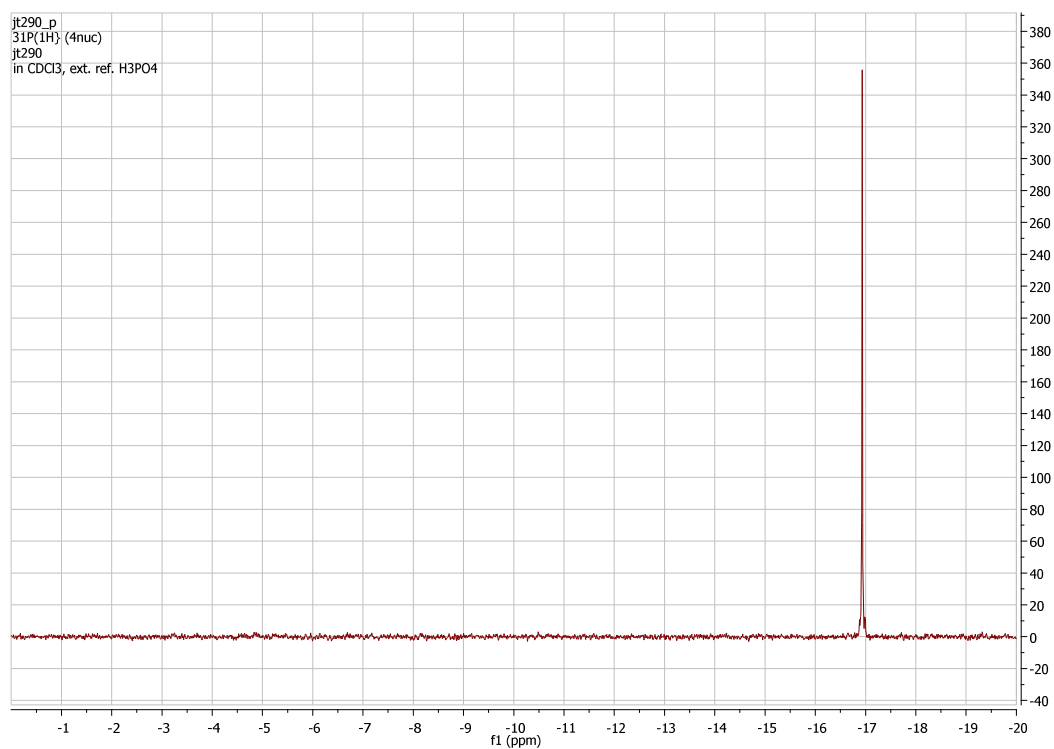

$^1\text{H}$  NMR spectrum of **10**

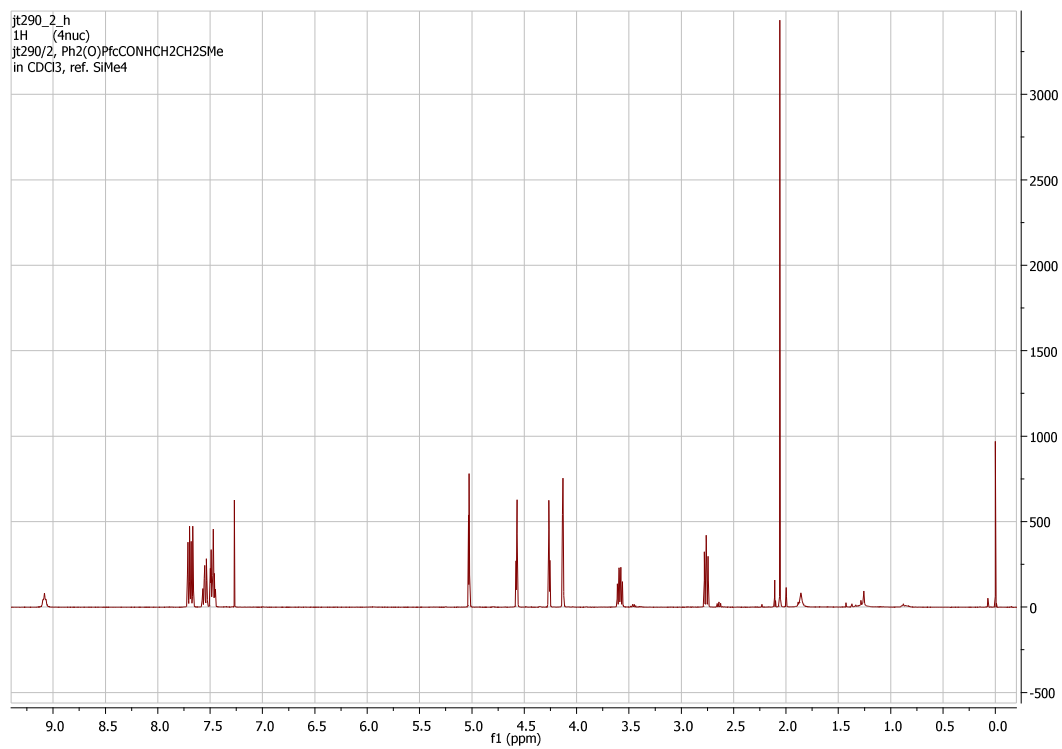



$^{13}\text{C}\{^1\text{H}\}$  NMR spectrum of **10**

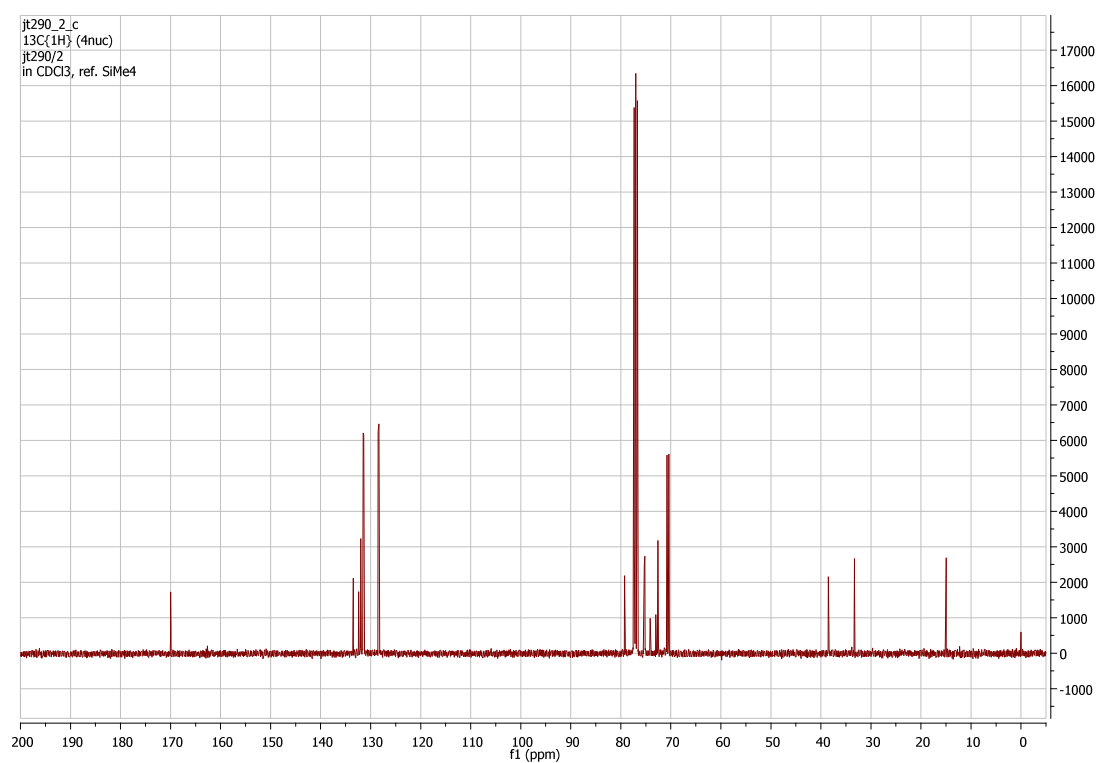

$^{31}\text{P}\{^1\text{H}\}$  NMR spectrum of **10**

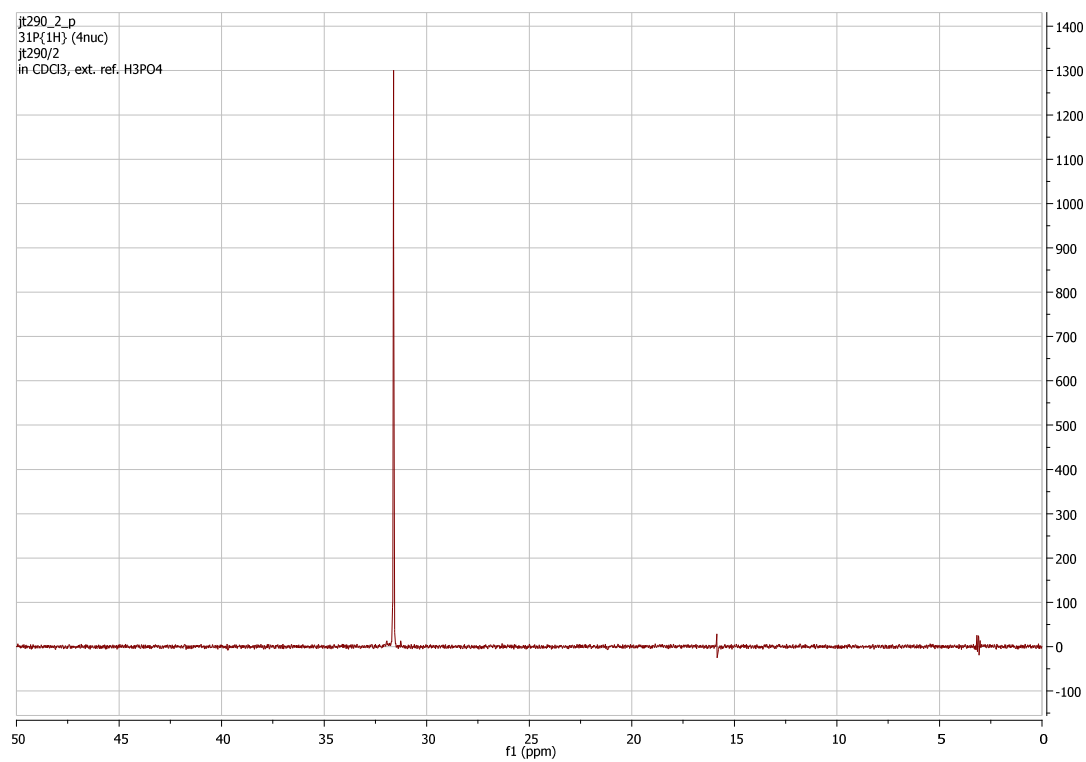

$^1\text{H}$  NMR spectrum of *trans*-2

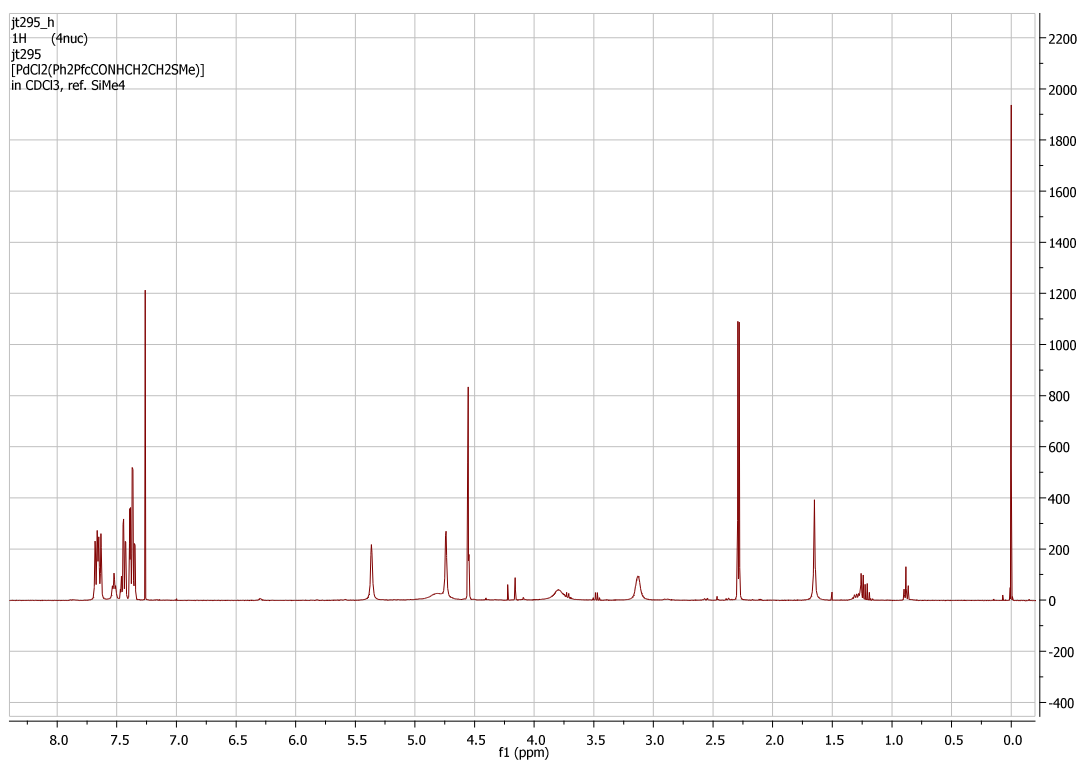

$^3\text{P}\{^1\text{H}\}$  NMR spectrum of *trans*-2

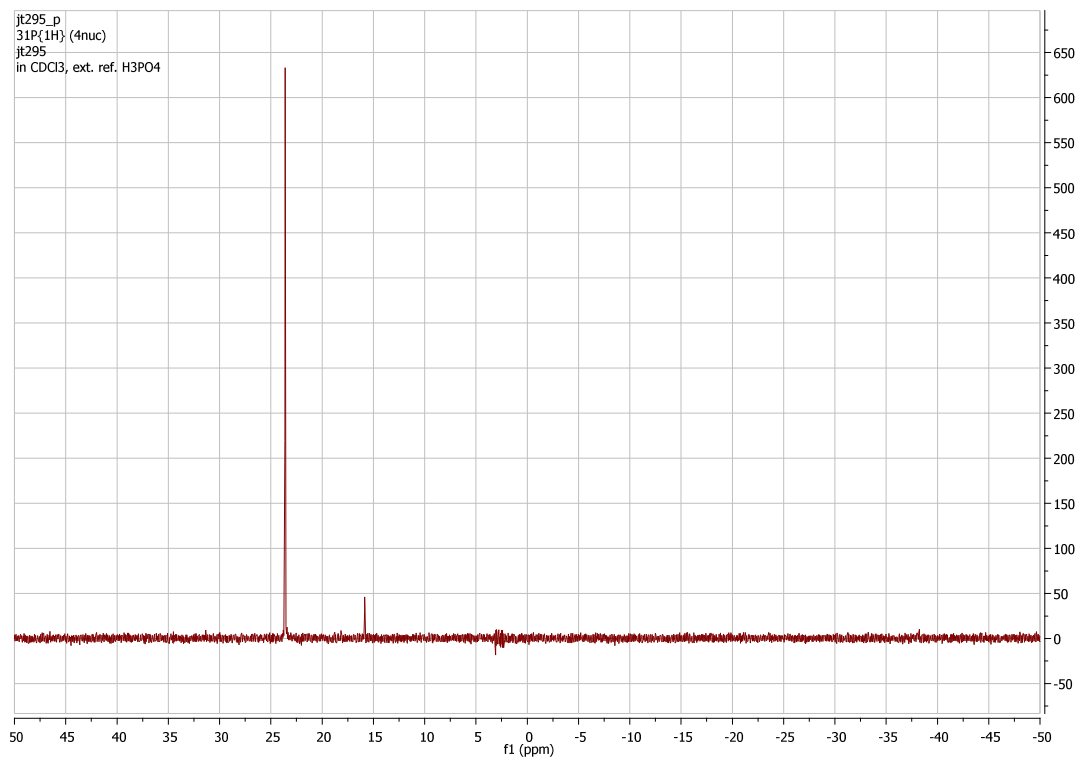

### $^1\text{H}$ NMR spectrum of *cis*-3

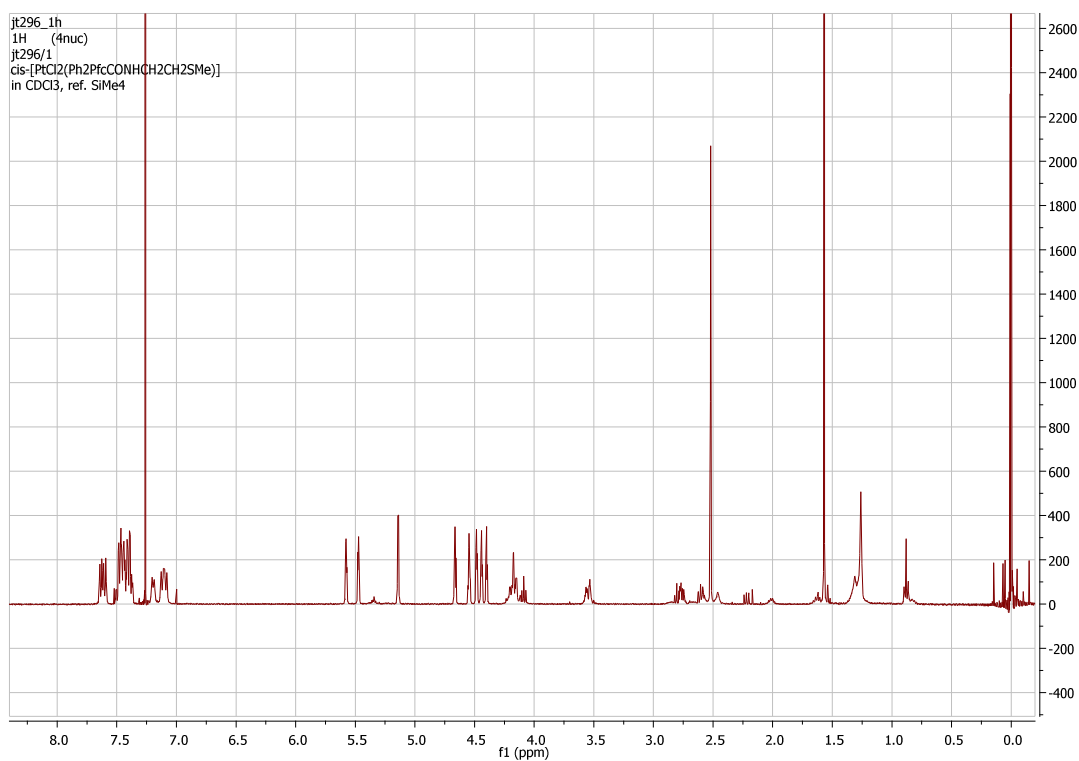

### $^3\text{P}\{^1\text{H}\}$ NMR spectrum of *cis*-3

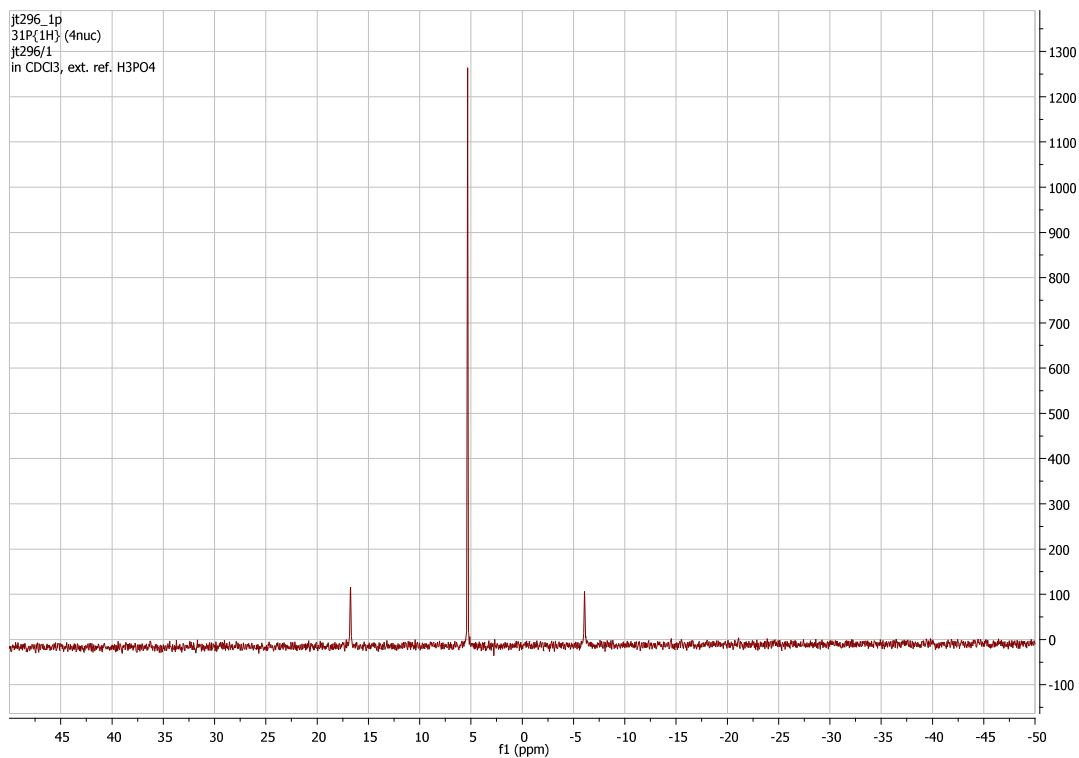

$^1\text{H}$  NMR spectrum of *trans*-3

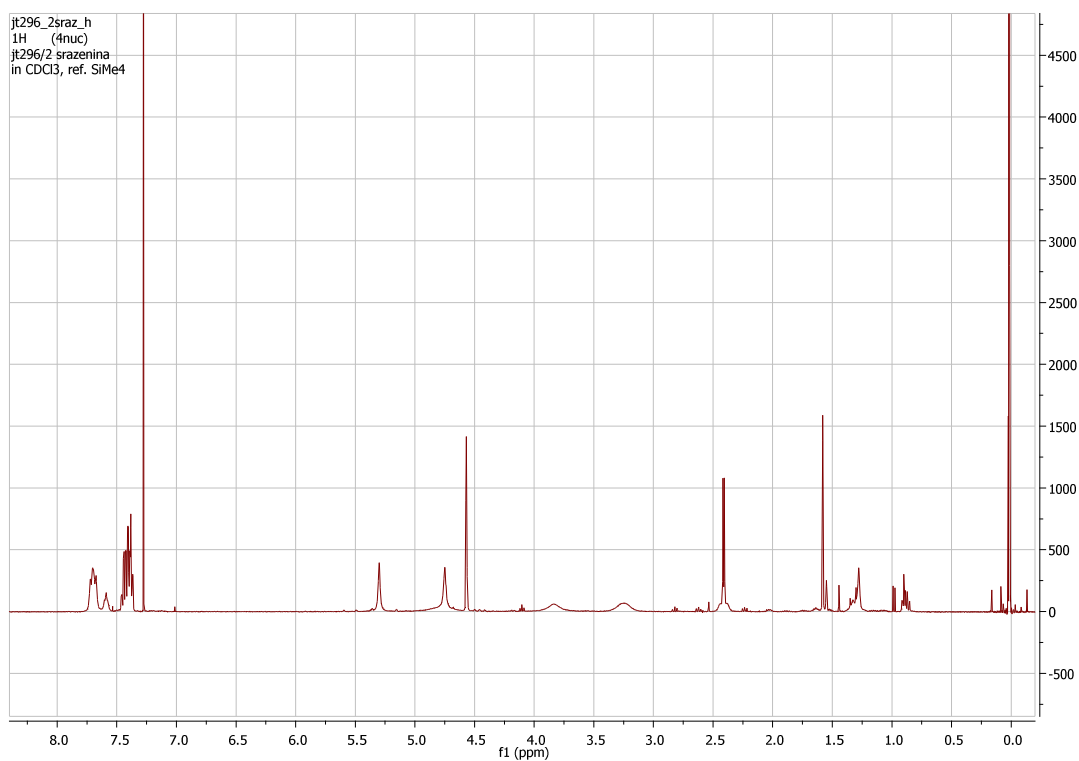

$^3\text{P}\{^1\text{H}\}$  NMR spectrum of *trans*-3

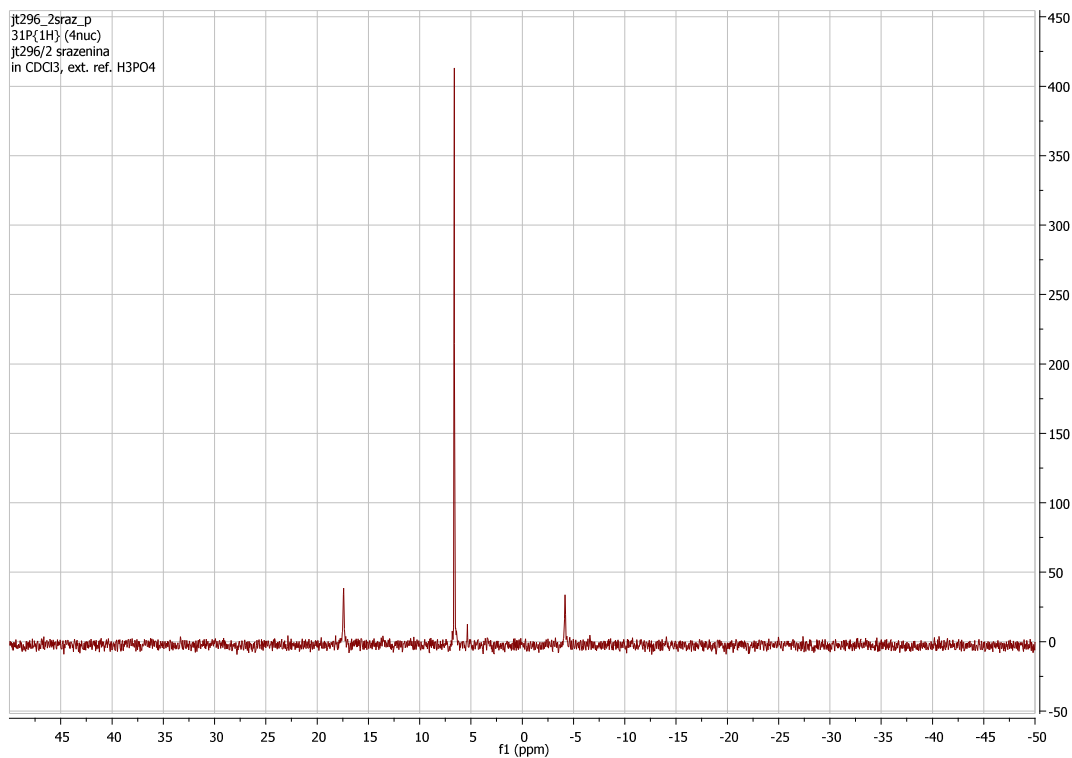

Supplement: c3dt52760c.pdf [file c3dt52760c.pdf]
